# Supplementary material
Source: Springer Nature journal article supplement (https://www.springermedizin.de/resource/supplementary/12936_2012_2599_MOESM15_ESM.pdf/9542970)

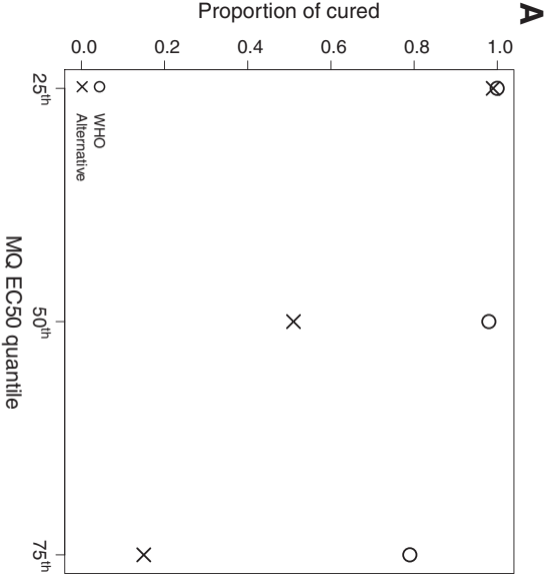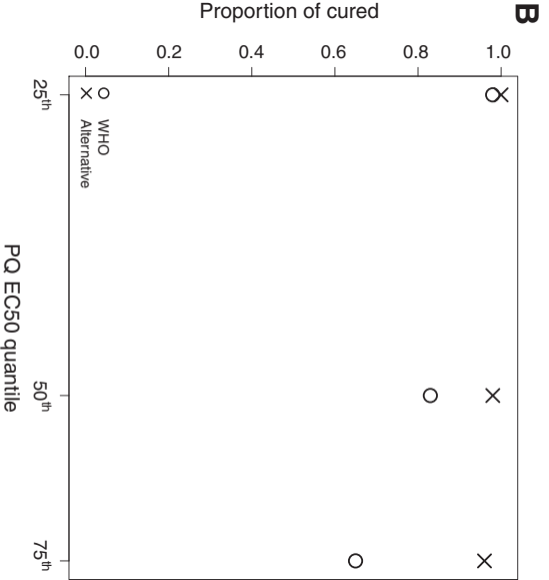

Supplement: MOESM15 [file 9542970]
